# Supplementary material
Source: PubMed Central journal article supplement (PMC7960246)
Supplement: 16-00868.pdf [file 16-00868.pdf]

**On-line Table: Motor-system assessment<sup>a</sup>**

|   | Score                                                                                        | Control (n = 8) | ABI (n = 5) |
|---|----------------------------------------------------------------------------------------------|-----------------|-------------|
| 1 | No self-mobility; wheelchair transported                                                     | 0               | 3           |
| 2 | Self-mobility in managed situation; wheelchair transported                                   | 0               | 1           |
| 3 | Effective self-mobility otherwise, not walking (wheelchair, rolling, scooting, and so forth) | 0               | 1           |
| 4 | Walks with limitations, including hand-held mobility devices (cane or walker)                | 0               | 0           |
| 5 | Walks without limitations                                                                    | 8               | 0           |

<sup>a</sup> Motor function assessment scoring scale, criteria, and individual subject results are shown.

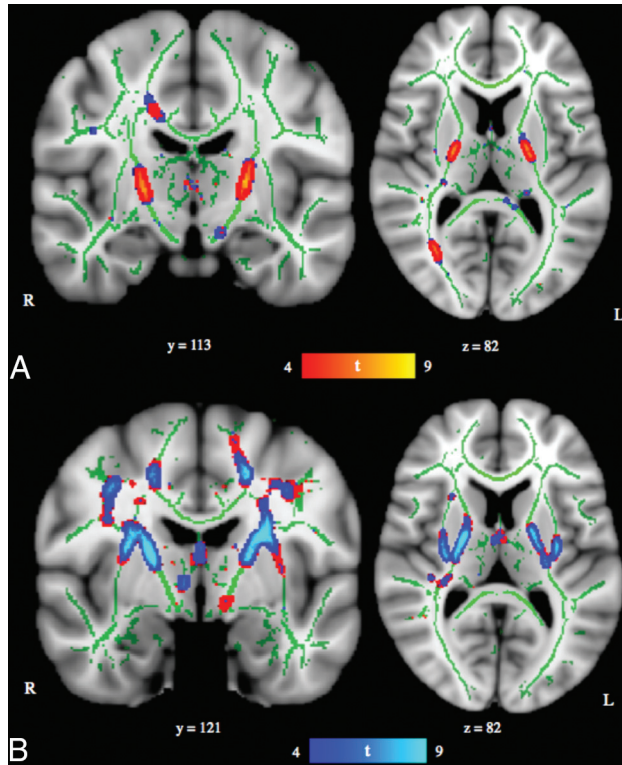

**ON-LINE FIGURE.** TBSS results at a lower threshold. *A*, TBSS-derived *t*-map of decreased fractional anisotropy in the anoxic brain injury group relative to the neurotypical control group ( $P < .001$ ) is shown in red-yellow, overlaid onto TBSS output at the lower threshold of  $P < .01$  in blue. *B*, TBSS-derived *t*-map of increased mean diffusivity in the ABI group relative to the neurotypical control group is shown in blue-light blue ( $P < .001$ ), overlaid onto TBSS output at the lower threshold of  $P < .01$  in red. Even at the less conservative threshold, FA and MD differences between the 2 groups remain relatively focal. All statistical maps were corrected for multiple comparisons. Results were thickened with *tbss\_fill* and are overlaid onto the study-specific white matter skeleton (green) and the Montreal Neurological Institute–152 template. Section position (given by *y* or *z* location) corresponds to MNI–152 template space.
